# Supplementary material
Source: publisher figshare collection journal article supplement (https://brill.figshare.com/ndownloader/files/14038118)
Supplement: Supplementary file 1 [file 14038118]

## Supplementary Materials

### Consonant frequencies in SWM, Lizu (Duoxu\_PCVG), and Duoxu

Table A1. Consonant frequencies in SWM, Lizu, and Duoxu (“Cons.”=consonant, “Occur.”=occurrence, “Freq.”=frequency, “Diff.”=difference). Empty cells indicate that the language does not have those consonants. Frequency columns show the normalized frequency of a consonant calculated from its number of occurrence. Difference columns show the occurrence and frequency differences of corresponding consonants between Lizu and Duoxu: “+” means that Duoxu has more occurrences (or higher frequency) of a consonant, “-” means that Duoxu has fewer occurrences (or lower frequency) of a consonant.

| Tag | Cons.           | SWM    |        | Lizu   |        | Duoxu  |        | Dif.      | Dif.     |
|-----|-----------------|--------|--------|--------|--------|--------|--------|-----------|----------|
|     |                 | Occur. | Freq.  | Occur. | Freq.  | Occur. | Freq.  | in occur. | in freq. |
| 1   | p               | 140    | 0.0673 | 97*    | 0.0434 | 62     | 0.0292 | -35       | -0.3608  |
| 2   | p <sup>h</sup>  | 55     | 0.0265 | 50*    | 0.0224 | 58     | 0.0273 | +8        | +0.1600  |
| 3   | b               |        |        | 120*   | 0.0537 | 95     | 0.0447 | -25       | -0.2083  |
| 4   | m               | 116    | 0.0558 | 165*   | 0.0738 | 226*   | 0.1065 | +61       | 0.3697   |
| 5   | w               | 55     | 0.0265 | 45     | 0.0201 | 107    | 0.0504 | +62       | 1.3778   |
| 6   | t               | 149    | 0.0717 | 100    | 0.0447 | 43     | 0.0203 | -57       | -0.5700  |
| 7   | t <sup>h</sup>  | 111    | 0.0534 | 48*    | 0.0215 | 31     | 0.0146 | -17       | -0.3542  |
| 8   | d               |        |        | 106*   | 0.0474 | 52*    | 0.0245 | -54       | -0.5094  |
| 9   | ts              | 148    | 0.0712 | 35     | 0.0157 | 25     | 0.0118 | -10       | -0.2857  |
| 10  | ts <sup>h</sup> | 30     | 0.0144 | 91*    | 0.0407 | 50     | 0.0236 | -41       | -0.4506  |
| 11  | dz              |        |        | 49*    | 0.0219 | 27     | 0.0127 | -22       | -0.4490  |
| 12  | n               | 43     | 0.0207 | 54     | 0.0242 | 40     | 0.0188 | -14       | -0.2593  |
| 13  | s               | 62     | 0.0298 | 66     | 0.0295 | 43     | 0.0203 | -23       | -0.3485  |
| 14  | z               |        |        | 39     | 0.0175 | 22     | 0.0104 | -17       | -0.4359  |
| 15  | ɹ               |        |        | 61     | 0.0273 |        |        | -61       | -1.0000  |
| 16  | l               | 100    | 0.0481 | 110    | 0.0492 | 116    | 0.0546 | +6        | 0.0546   |
| 17  | ɭ               |        |        | 22     | 0.0098 |        |        | -22       | -1.0000  |
| 18  | tʃ              | 82     | 0.0394 | 27     | 0.0121 | 9      | 0.0042 | -18       | -0.6667  |
| 19  | tʃ <sup>h</sup> | 70     | 0.0337 | 60*    | 0.0268 | 27     | 0.0127 | -33       | -0.5500  |
| 20  | dʒ              |        |        | 78*    | 0.0349 | 29     | 0.0137 | -49       | -0.6282  |
| 21  | ʃ               | 140    | 0.0673 | 76*    | 0.0340 | 52     | 0.0245 | -24       | -0.3158  |
| 22  | ʒ               | 24     | 0.0115 | 19*    | 0.0085 | 33     | 0.0155 | +14       | 0.7368   |
| 23  | tɕ              | 127    | 0.0611 | 46     | 0.0206 | 98     | 0.0462 | +52       | 1.1304   |
| 24  | tɕ <sup>h</sup> | 84     | 0.0404 | 42*    | 0.0188 | 101    | 0.0476 | +59       | 1.4048   |
| 25  | dʑ              |        |        | 63*    | 0.0282 | 88     | 0.0415 | +25       | 0.3968   |
| 26  | ɲ               | 48     | 0.0231 | 65     | 0.0291 | 97     | 0.0457 | +32       | 0.4923   |
| 27  | ɕ               | 103    | 0.0495 | 14     | 0.0063 | 76     | 0.0358 | +62       | 4.4285   |
| 28  | ʐ               |        |        | 33     | 0.0148 | 25     | 0.0118 | -8        | -0.2424  |
| 29  | j               | 152    | 0.0731 | 61     | 0.0273 | 127    | 0.0598 | +66       | 1.0820   |
| 30  | k               | 114    | 0.0548 | 66     | 0.0295 | 105    | 0.0495 | +39       | 0.5909   |
| 31  | k <sup>h</sup>  | 51     | 0.0245 | 74*    | 0.0331 | 96     | 0.0452 | +22       | 0.2973   |
| 32  | g               |        |        | 80*    | 0.0358 | 91     | 0.0429 | +11       | 0.1375   |
| 33  | ŋ               | 9      | 0.0043 | 24     | 0.0107 | 17     | 0.0080 | -7        | -0.2917  |
| 34  | x               |        |        | 25*    | 0.0112 | 37     | 0.0174 | +12       | 0.4800   |
| 35  | [f]             | 66     | 0.0317 | 15     | 0.0067 | 12     | 0.0057 | -3        | -0.2000  |
| 36  | ɣ [ʋ]           |        |        | 19     | 0.0085 | 6      | 0.0028 | -13       | -0.6842  |

|    |                |    |        |     |         |
|----|----------------|----|--------|-----|---------|
| 37 | q              | 40 | 0.0179 | -40 | -1.0000 |
| 38 | q <sup>h</sup> | 14 | 0.0063 | -14 | -1.0000 |
| 39 | g              | 6  | 0.0027 | -6  | -1.0000 |
| 40 | h̃ [h̃]        | 30 | 0.0134 | -30 | -1.0000 |

\*: also includes occurrences of these initial consonants in clusters (e.g. /bʲ, bz, Nd, Ntɕ<sup>h</sup>/ etc.)

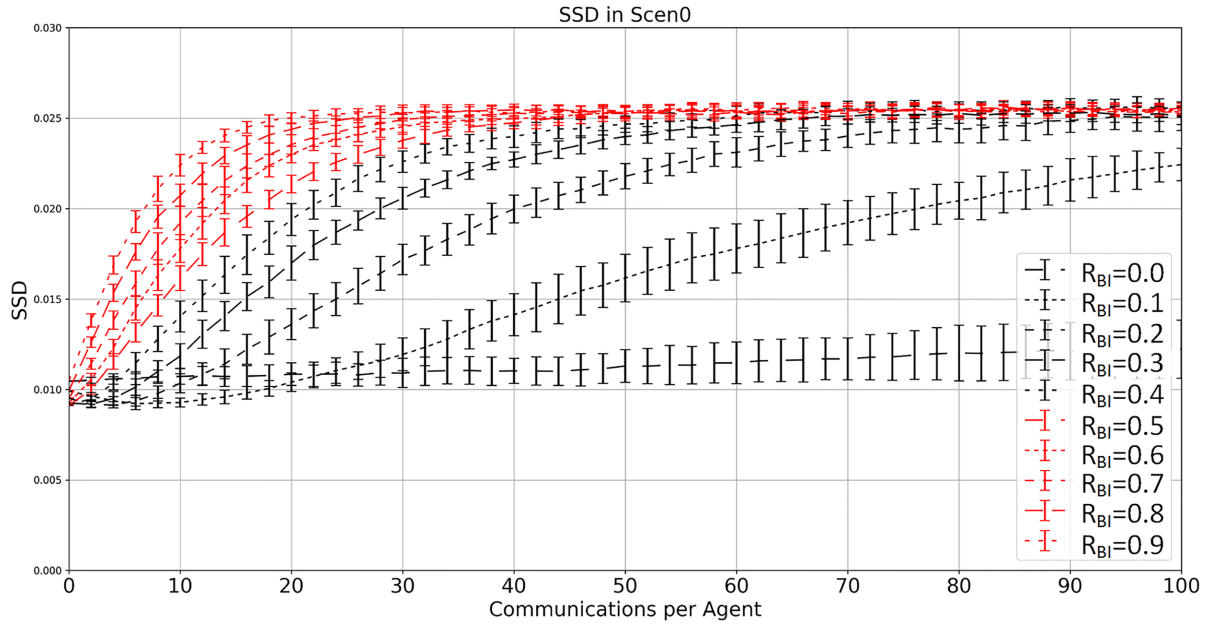

(a)

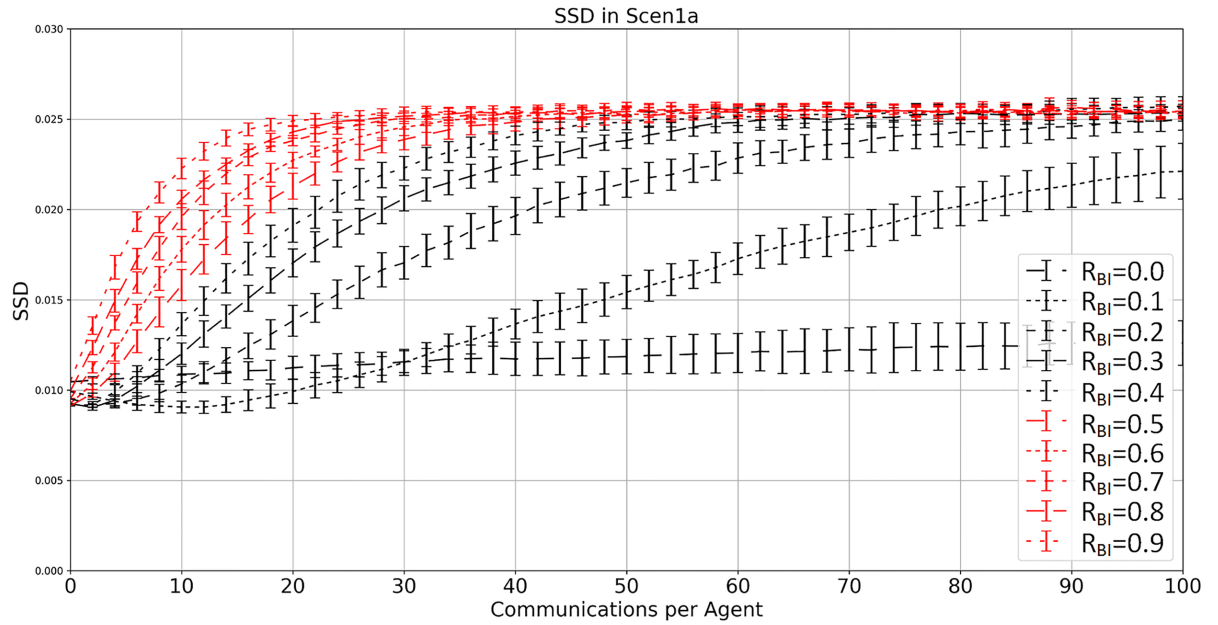

(b)

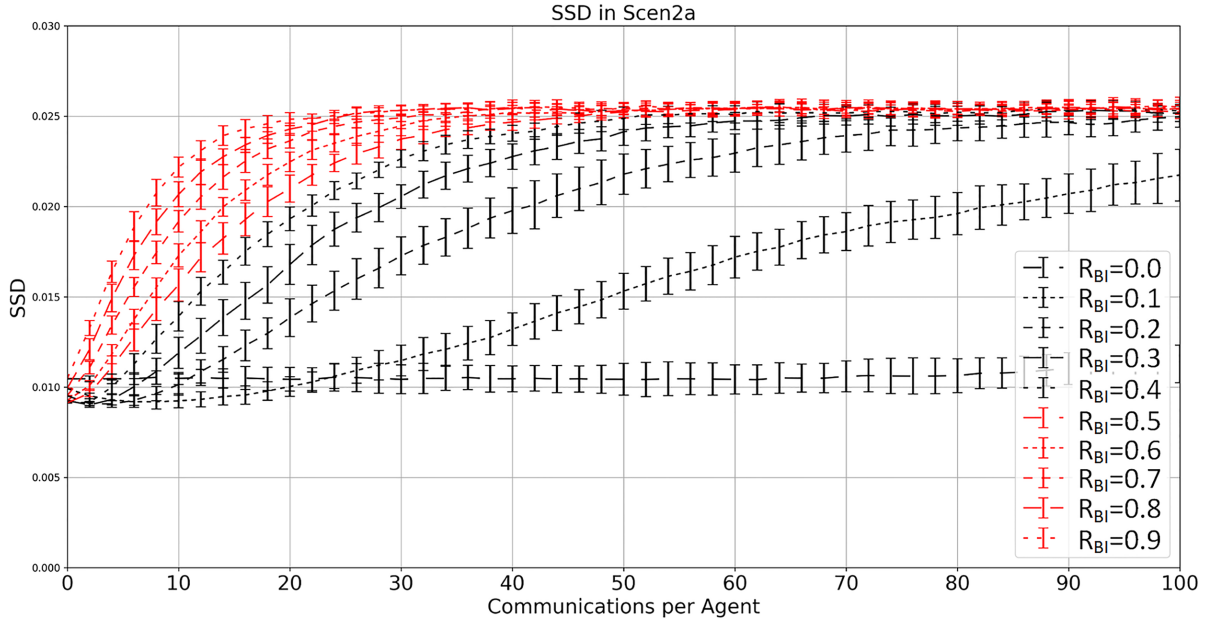

(c)

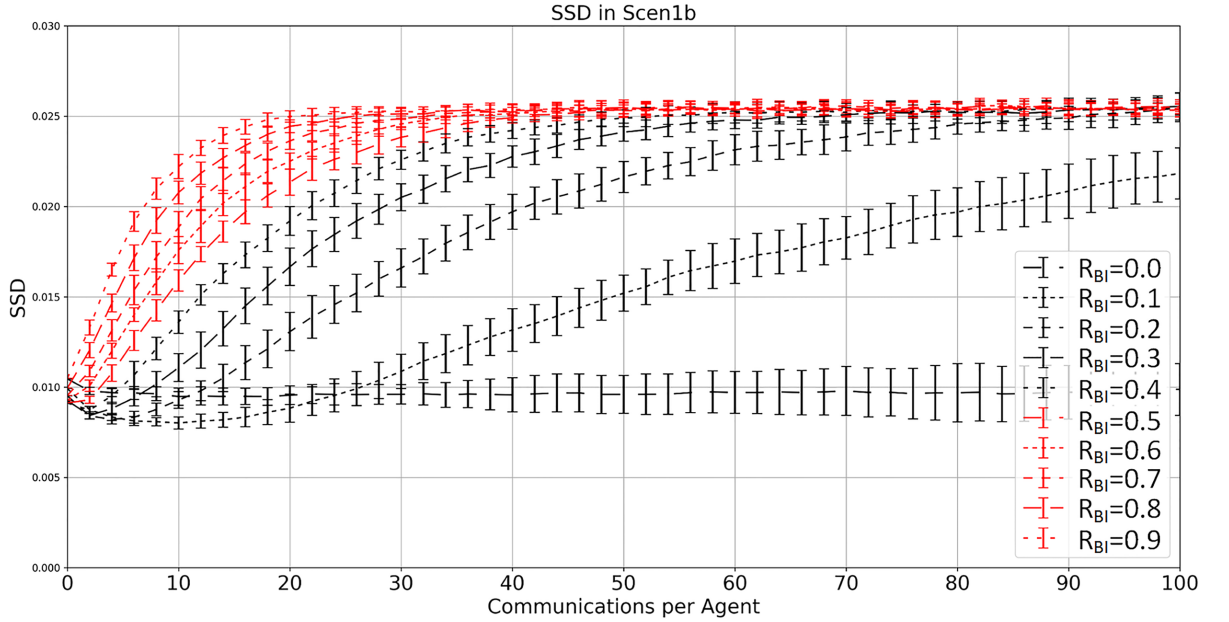

(d)

Figure A1. Mean SSD values obtained throughout 10,000 communications in scenario 0 (a), 1a (b), 2a (c), and 1b (d). Each curve in each figure corresponds to the result under a particular  $R_{BI}$ . Results are averaged over 20 runs in each condition.

### Effects of $F_{MKD}$ and $F_{ADJ}$

In this section, we briefly discuss the effects of the parameters  $F_{MKD}$  and  $F_{ADJ}$ . For the sake of simplicity, we fix the values of all other model parameters and vary the values of  $F_{MKD}$  and  $F_{ADJ}$  to examine their effects on the dynamics of the system. The results are based on the average SSD values obtained at each sampling point over 20 runs of the same setting. Since most discussion in the main text concerns a small  $R_{BI}$ , here, we fix  $R_{BI}$  as 0.1. The values of the other parameters (such as  $N_P$ ,  $N_C$ , and  $N_{CONS}$ ) are the same as those in the main text. For

each of the two parameters  $F_{MKD}$  and  $F_{ADJ}$ , we select two additional values, one larger and the other smaller than the value set in the simulations in the main text.

$F_{MKD}$  is used in scenarios 1a and 1b. Together with the current value of 0.01 used in the simulations, we select another two values (0.005 and 0.05) for comparison. Figure A2 shows the average SSD values throughout the simulations in scenario 1a under these values (0.005, 0.01, and 0.05). Note that in this scenario, where low frequency of occurrence and markedness take effect only in bilingual-bilingual communications, the SSD values under all three  $F_{MKD}$  values are similar throughout the simulations.

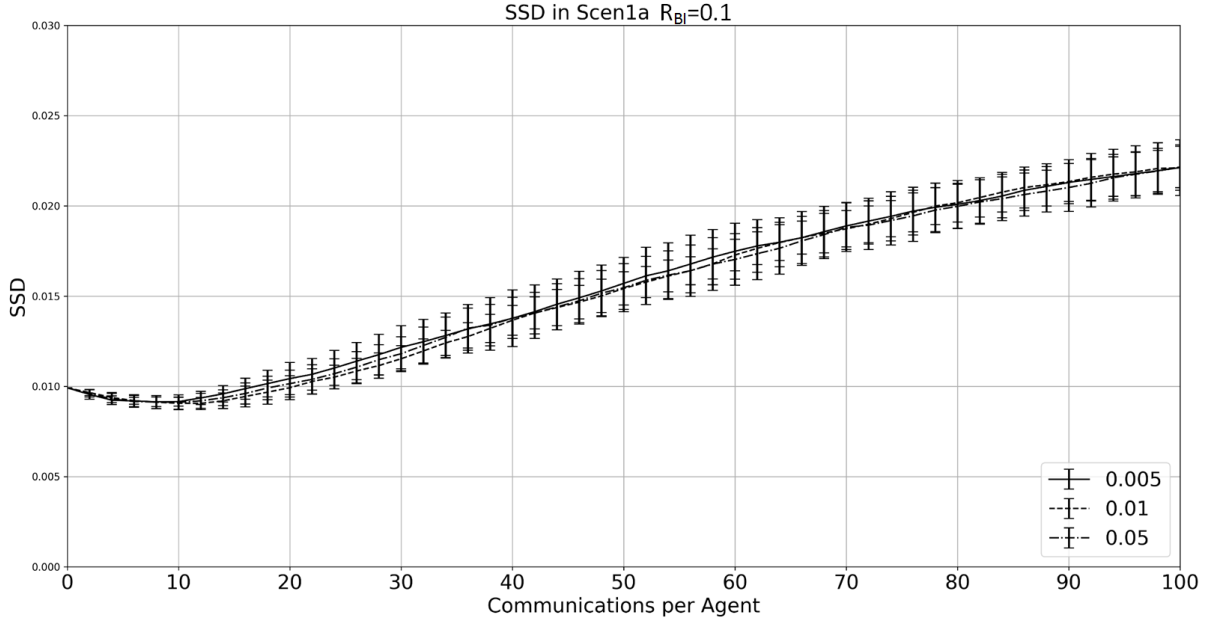

Figure A2. Mean SSD values obtained throughout 10,000 communications in scenario 1a under  $R_{BI}=0.1$ . Each curve represents the average results over 20 runs under a particular  $F_{MKD}$ .

$F_{ADJ}$  takes effect in all four scenarios. Here, we only consider scenario 2b, and together with the current value (0.002) in the simulations reported in the main text, we choose another two values (0.001 and 0.005). Figure A3 shows the average SSD values throughout the simulations in the two scenarios under the three values of  $F_{ADJ}$  (0.001, 0.002, and 0.005). It is shown that in this scenario, the SSD values under all three  $F_{ADJ}$  values are similar throughout the simulations.

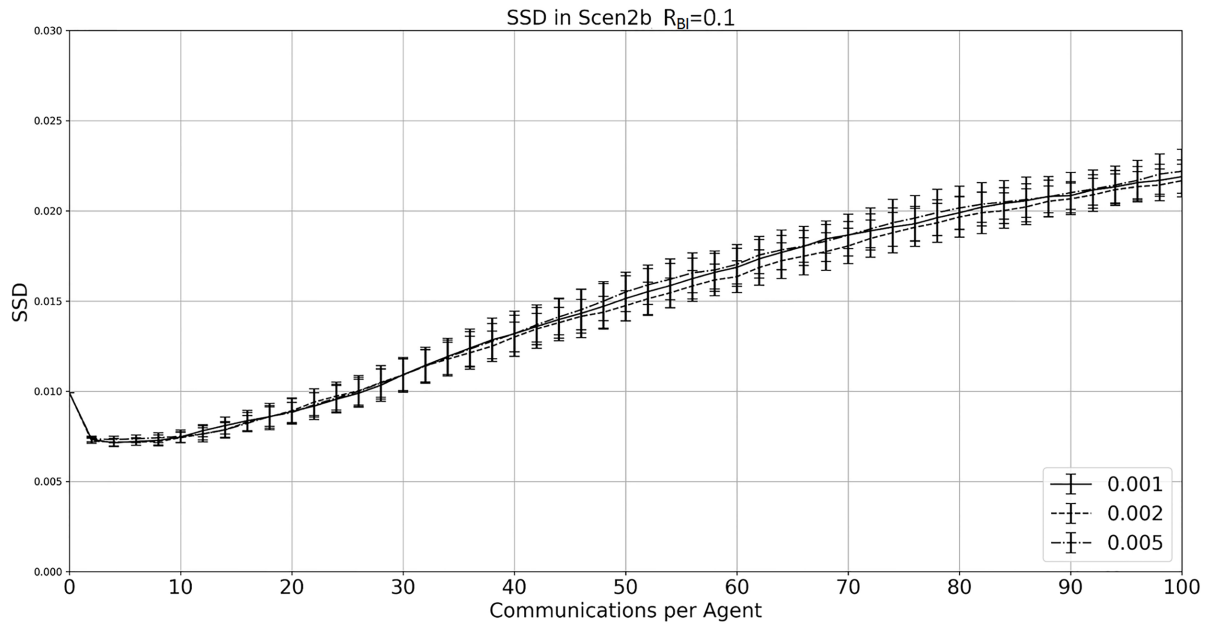

Figure A3. Mean SSD values obtained throughout 10,000 communications in scenario 2b under  $R_{BI}=0.1$ . Each curve represents the average results over 20 runs under a particular  $F_{ADJ}$ .
